# Supplementary material
Source: PubMed Central journal article supplement (PMC3387047)
Supplement: 1205338109_pnas.201205338SI.pdf [file 1205338109_pnas.201205338SI.pdf]

# Supporting Information

Laitin et al. 10.1073/pnas.1205338109

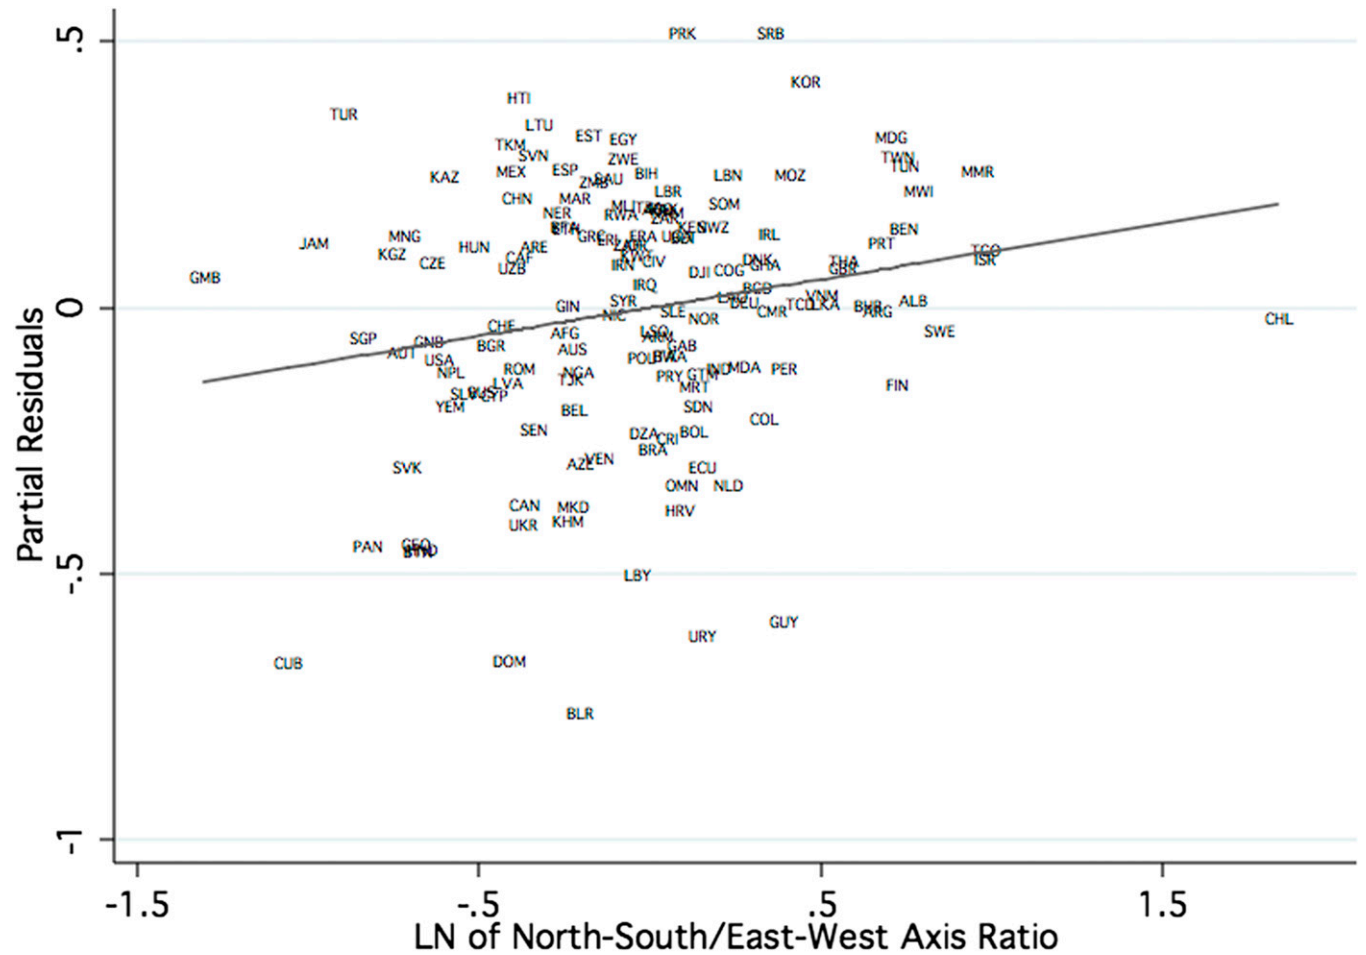

Fig. S1. Partial residuals plot showing the effect of axis ratio on the persistence of linguistic diversity, conditional on control variables (total number of historically spoken languages, distance from the equator, range in land quality, size of the country, elevation difference, and age of the country). Country code labels can be accessed in [Dataset S1](#).

**Table S1. Summary statistics**

| Variable                                         | Mean  | SD    | Minimum | Maximum | <i>n</i> |
|--------------------------------------------------|-------|-------|---------|---------|----------|
| Axis ratio                                       | 1.09  | 0.65  | 0.27    | 6.26    | 147      |
| Axis ratio, with S. America reversed             | 1.02  | 0.49  | 0.16    | 2.67    | 147      |
| Proportion of language persistence               | 0.64  | 0.31  | 0       | 1       | 147      |
| No. of self-perpetuating indigenous languages    | 27.65 | 59.87 | 0       | 493     | 147      |
| No. of nonself-perpetuating indigenous languages | 13.69 | 29.02 | 0       | 169     | 147      |
| Total no. of indigenous languages                | 41.34 | 77.77 | 0       | 521     | 147      |
| Distance from equator (degree latitude)          | 27.01 | 16.78 | 0       | 64      | 147      |
| Range in land quality                            | 0.71  | 0.29  | 0       | 1       | 147      |
| Area (in 1,000s of km <sup>2</sup> )             | 856   | 2,100 | 0.49    | 16,650  | 147      |
| Elevation difference (1,000 m)                   | 3.07  | 2.05  | 0.05    | 9.00    | 147      |
| Age, decades since independence                  | 8.83  | 5.62  | 1.9     | 19.6    | 147      |
| Postcolonial state                               | 0.43  | 0.50  | 0       | 1       | 147      |
| Artificiality of state borders                   | -0.01 | 1.06  | -2.10   | 3.47    | 110      |

**Table S2. Geographic axes and the persistence of linguistic diversity, sensitivity to excluding control variables one at a time, ordinary least-squares regressions**

| Variable                                     | Model 1      | Model 2      | Model 3      | Model 4      | Model 5      | Model 6      |
|----------------------------------------------|--------------|--------------|--------------|--------------|--------------|--------------|
| Axis ratio (natural log)                     | 0.16**       | 0.18***      | 0.15**       | 0.16**       | 0.18***      | 0.12         |
|                                              | 0.10 (0.04)  | 0.12 (0.04)  | 0.10 (0.04)  | 0.10 (0.04)  | 0.12 (0.05)  | 0.07 (0.05)  |
| Total no. of languages                       |              | 0.22***      | 0.16**       | 0.15***      | 0.15**       | 0.18***      |
|                                              |              | 0.09 (0.02)  | 0.06 (0.02)  | 0.06 (0.02)  | 0.06 (0.02)  | 0.07 (0.02)  |
| Equator distance                             | -0.22***     |              | -0.20**      | -0.17**      | -0.16*       | -0.27***     |
|                                              | -0.40 (0.14) |              | -0.37 (0.15) | -0.31 (0.15) | -0.29 (0.15) | -0.50 (0.14) |
| Land quality range                           | -0.10        | -0.17*       |              | -0.15*       | -0.19**      | -0.16*       |
|                                              | -0.11 (0.10) | -0.19 (0.10) |              | -0.16 (0.09) | -0.20 (0.10) | -0.17 (0.09) |
| Area in 1,000s km <sup>2</sup> (natural log) | -0.03        | -0.08        | -0.13*       |              | -0.13        | -0.15*       |
|                                              | -0.01 (0.01) | -0.01 (0.01) | -0.02 (0.01) |              | -0.02 (0.01) | -0.03 (0.01) |
| Elevation difference in 1,000s m             | -0.17**      | -0.17**      | -0.23***     | -0.20***     |              | -0.22**      |
|                                              | -0.03 (0.01) | -0.03 (0.01) | -0.03 (0.01) | -0.03 (0.01) |              | -0.03 (0.01) |
| Age of country in decades                    | -0.39***     | -0.43***     | -0.39***     | -0.40***     | -0.40***     |              |
|                                              | -0.02 (0.00) | -0.02 (0.00) | -0.02 (0.00) | -0.02 (0.00) | -0.02 (0.00) |              |
| Constant                                     | 1.12 (0.07)  | 1.10 (0.06)  | 1.13 (0.06)  | 1.11 (0.05)  | 1.16 (0.06)  | 1.12 (0.07)  |
| Observations                                 | 147          | 147          | 147          | 147          | 147          | 147          |
| Adjusted <i>r</i> <sup>2</sup>               | 0.38         | 0.38         | 0.39         | 0.40         | 0.37         | 0.27         |

Standardized coefficients, \*\*\**P* < 0.01, \*\**P* < 0.05, \**P* < 0.1; nonstandardized coefficients (robust SEs).

**Table S3. Geographic axes and the persistence of linguistic diversity, South American axis ratio reversed, ordinary least-squares regression**

| Variable                                     | Model        |
|----------------------------------------------|--------------|
| Axis ratio (natural log)                     | 0.23***      |
|                                              | 0.15 (0.04)  |
| Total number of indigenous languages         | 0.15**       |
|                                              | 0.06 (0.02)  |
| Distance from equator                        | -0.18**      |
|                                              | -0.34 (0.14) |
| Land quality range                           | -0.13        |
|                                              | -0.14 (0.10) |
| Area in 1,000s km <sup>2</sup> (natural log) | -0.09        |
|                                              | -0.02 (0.01) |
| Elevation difference in 1,000s m             | -0.14*       |
|                                              | -0.02 (0.01) |
| Age of country in decades                    | -0.36***     |
|                                              | -0.02 (0.00) |
| Constant                                     | 1.14 (0.07)  |
| Continent fixed effects?                     | No           |
| Observations                                 | 147          |
| Adjusted <i>r</i> <sup>2</sup>               | 0.42         |

Standardized Coefficients, \*\*\**P* < 0.01, \*\**P* < 0.05, \**P* < 0.1; nonstandardized coefficients (robust SEs).

## Other Supporting Information Files

[Dataset S1 \(XLSX\)](#)

[Dataset S2 \(XLSX\)](#)

[Dataset S3 \(XLSX\)](#)

[Dataset S4 \(XLSX\)](#)
